# Supplementary material for: IL7RA rs6897932 Polymorphism Is Associated with Better CD4+ T-Cell Recovery in HIV Infected Patients Starting Combination Antiretroviral Therapy
Source: Biomolecules. 2019 Jun 16;9(6):233. doi: 10.3390/biom9060233 (PMC6627042; doi:10.3390/biom9060233)
Supplement: Supplementary file 1 [file biomolecules-09-00233-s001.xlsx]

## Sheet: Hoja1
Slope CD4+ recovery												CD4+ increase (ΔCD4+)												CD4+ at the end of follow-up
Parameter	B	Std. Error	95% Wald Confidence Interval		Hypothesis Test			Exp(B)	95% Wald Confidence Interval for Exp(B)			Parameter	B	Std. Error	95% Wald Confidence Interval		Hypothesis Test			Exp(B)	95% Wald Confidence Interval for Exp(B)			Parameter	B	Std. Error	95% Wald Confidence Interval		Hypothesis Test			Exp(B)	95% Wald Confidence Interval for Exp(B)
			Lower	Upper	Wald Chi-Square	df	Sig.		Lower	Upper					Lower	Upper	Wald Chi-Square	df	Sig.		Lower	Upper					Lower	Upper	Wald Chi-Square	df	Sig.		Lower	Upper
(Intercept)	2.73617	0.173577	2.39597	3.07638	248.486	1	0	15.4278	10.9788	21.6797		(Intercept)	6.01611	0.170511	5.68191	6.3503	1244.88	1	0	409.98	293.511	572.667		(Intercept)	5.96586	0.130894	5.70932	6.22241	2077.34	1	0	389.89	301.665	503.917
[rs6897932_CT_TT=1,00]	0.148446	0.0616734	0.0275683	0.269324	5.7935	1	0.0160855	1.16003	1.02795	1.30908		[rs6897932_CT_TT=1,00]	0.174572	0.0603048	0.0563769	0.292768	8.38004	1	0.00379365	1.19074	1.058	1.34013		[rs6897932_CT_TT=1,00]	0.12556	0.0453666	0.0366434	0.214477	7.66006	1	0.00564567	1.13378	1.03732	1.23921
[rs6897932_CT_TT=,00]	0a							1				[rs6897932_CT_TT=,00]	0a							1				[rs6897932_CT_TT=,00]	0a							1
Age	-0.0170923	0.00331084	-0.0235814	-0.0106032	26.6516	1	2.43645e-07	0.983053	0.976694	0.989453		Age	-0.0136479	0.00315454	-0.0198307	-0.00746513	18.718	1	1.51545e-05	0.986445	0.980365	0.992563		Age	-0.00963197	0.00233449	-0.0142075	-0.00505645	17.0234	1	3.69229e-05	0.990414	0.985893	0.994956
Male	0.260981	0.0666721	0.130306	0.391656	15.3225	1	9.06305e-05	1.2982	1.13918	1.47943		Male	0.196619	0.0670235	0.0652554	0.327983	8.60591	1	0.00335073	1.21728	1.06743	1.38817		Male	0.129911	0.0519181	0.0281537	0.231669	6.26118	1	0.0123412	1.13873	1.02855	1.2607
Baseline_CD4	-2.0663e-06	0.000489762	-0.000961982	0.000957849	1.77998e-05	1	0.996634	0.999998	0.999038	1.00096		Baseline_CD4	0.000341788	0.000481369	-0.000601677	0.00128525	0.504149	1	0.477683	1.00034	0.999399	1.00129		Baseline_CD4	0.00272257	0.000376338	0.00198497	0.00346018	52.3363	1	4.6766e-13	1.00273	1.00199	1.00347
Years_infection	-0.0108728	0.011071	-0.0325715	0.0108259	0.964523	1	0.32605	0.989186	0.967953	1.01088		Years_infection	-0.0120879	0.0105261	-0.0327186	0.00854283	1.31877	1	0.250813	0.987985	0.967811	1.00858		Years_infection	-0.0083748	0.00723182	-0.0225489	0.00579931	1.34108	1	0.246844	0.99166	0.977703	1.00582
IDU	-0.118671	0.11232	-0.338815	0.101473	1.11628	1	0.290721	0.8881	0.712615	1.1068		IDU	-0.149051	0.11183	-0.368234	0.0701323	1.77644	1	0.182587	0.861525	0.691956	1.07265		IDU	-0.10903	0.0834133	-0.272517	0.0544572	1.70852	1	0.191177	0.896704	0.76146	1.05597
PI_cART	-0.111392	0.0608912	-0.230737	0.00795271	3.34655	1	0.0673459	0.894588	0.793949	1.00798		PI_cART	-0.123451	0.0594491	-0.239969	-0.00693256	4.31217	1	0.0378406	0.883865	0.786653	0.993091		PI_cART	-0.0937876	0.0445918	-0.181186	-0.00638941	4.42366	1	0.0354439	0.910476	0.83428	0.993631
HCV	-0.149615	0.146963	-0.437658	0.138428	1.03641	1	0.308659	0.86104	0.645547	1.14847		HCV	-0.0991089	0.141653	-0.376744	0.178526	0.489523	1	0.48414	0.905644	0.686092	1.19545		HCV	-0.0519149	0.107453	-0.262518	0.158688	0.233427	1	0.628995	0.94941	0.769112	1.17197
HBV	-0.164526	0.173893	-0.50535	0.176298	0.895166	1	0.344081	0.848296	0.603294	1.19279		HBV	-0.161076	0.166653	-0.48771	0.165557	0.934195	1	0.333775	0.851227	0.614031	1.18005		HBV	-0.131225	0.119434	-0.365312	0.102861	1.2072	1	0.271887	0.87702	0.69398	1.10834
Caucasian	0.0540883	0.0724547	-0.0879204	0.196097	0.557278	1	0.455359	1.05558	0.915834	1.21664		Caucasian	0.0405356	0.071541	-0.0996822	0.180753	0.321043	1	0.570982	1.04137	0.905125	1.19812		Caucasian	0.0314056	0.0544706	-0.0753548	0.138166	0.332422	1	0.564237	1.0319	0.927414	1.14817
(Scale)	42,722b	2.98751	37.2506	48.9981								(Scale)	33397,971b	2335.47	29120.4	38303.9								(Scale)	33609,423b	2350.25	29304.7	38546.4
Dependent Variable: SLOPE Model: (Intercept), rs6897932_CT_TT, Age, Male, Baseline_CD4, Years_infection, IDU, PI_cART, HCV, HBV, Caucasian												Dependent Variable: DeltaCD4mes24 Model: (Intercept), rs6897932_CT_TT, Age, Male, Baseline_CD4, Years_infection, IDU, PI_cART, HCV, HBV, Caucasian												Dependent Variable: CD4.f Model: (Intercept), rs6897932_CT_TT, Age, Male, Baseline_CD4, Years_infection, IDU, PI_cART, HCV, HBV, Caucasian
a. Set to zero because this parameter is redundant.												a. Set to zero because this parameter is redundant.												a. Set to zero because this parameter is redundant.
b. Maximum likelihood estimate.												b. Maximum likelihood estimate.												b. Maximum likelihood estimate.
≥10 CD4+ cells/mm3 per month												≥200 CD4+ cells/mm3												≥350 CD4+ cells/mm3
Parameter	B	Std. Error	95% Wald Confidence Interval		Hypothesis Test			Exp(B)	95% Wald Confidence Interval for Exp(B)			Parameter	B	Std. Error	95% Wald Confidence Interval		Hypothesis Test			Exp(B)	95% Wald Confidence Interval for Exp(B)			Parameter	B	Std. Error	95% Wald Confidence Interval		Hypothesis Test			Exp(B)	95% Wald Confidence Interval for Exp(B)
			Lower	Upper	Wald Chi-Square	df	Sig.		Lower	Upper					Lower	Upper	Wald Chi-Square	df	Sig.		Lower	Upper					Lower	Upper	Wald Chi-Square	df	Sig.		Lower	Upper
(Intercept)	-1.56307	0.893881	-3.31505	0.1889	3.05774	1	0.0803536	0.209491	0.0363322	1.20792		(Intercept)	-1.20895	0.887647	-2.94871	0.530806	1.85497	1	0.173207	0.29851	0.0524075	1.7003		(Intercept)	0.00056258	0.902571	-1.76844	1.76957	3.88513e-07	1	0.999503	1.00056	0.170598	5.86833
[rs6897932_CT_TT=,00]	0.562518	0.218371	0.134519	0.990516	6.63565	1	0.00999577	1.75509	1.14399	2.69262		[rs6897932_CT_TT=,00]	0.488795	0.233687	0.0307779	0.946812	4.37508	1	0.0364681	1.63035	1.03126	2.57748		[rs6897932_CT_TT=,00]	0.409682	0.231568	-0.0441823	0.863546	3.12995	1	0.0768659	1.50634	0.95678	2.37156
[rs6897932_CT_TT=1,00]	0a							1				[rs6897932_CT_TT=1,00]	0a							1				[rs6897932_CT_TT=1,00]	0a							1
Age	0.0435627	0.0109159	0.0221679	0.0649574	15.9261	1	6.58635e-05	1.04453	1.02242	1.06711		Age	0.0240709	0.0108718	0.00276255	0.0453792	4.90209	1	0.0268242	1.02436	1.00277	1.04642		Age	0.0270327	0.0110987	0.00527961	0.0487858	5.93243	1	0.0148647	1.0274	1.00529	1.05
[Male=1]	0.294841	0.257737	-0.210315	0.799996	1.30864	1	0.252641	1.34291	0.810329	2.22553		[Male=1]	0.43414	0.285625	-0.125674	0.993955	2.3103	1	0.128519	1.54364	0.881902	2.7019		[Male=1]	0.639282	0.278237	0.0939472	1.18462	5.27904	1	0.0215837	1.89512	1.0985	3.26944
[Male=2]	0a							1				[Male=2]	0a							1				[Male=2]	0a							1
Baseline_CD4	0.000777966	0.00169501	-0.00254419	0.00410012	0.210658	1	0.646252	1.00078	0.997459	1.00411		Baseline_CD4	-0.000770434	0.00178579	-0.00427052	0.00272965	0.186127	1	0.66616	0.99923	0.995739	1.00273		Baseline_CD4	-0.0127158	0.00188679	-0.0164138	-0.00901775	45.4194	1	1.5905e-11	0.987365	0.98372	0.991023
Years_infection	0.0401889	0.029446	-0.0175241	0.097902	1.86278	1	0.172304	1.04101	0.982629	1.10285		Years_infection	0.0351962	0.0277051	-0.0191049	0.0894972	1.61388	1	0.203948	1.03582	0.981076	1.09362		Years_infection	0.0253156	0.029428	-0.0323623	0.0829935	0.740039	1	0.389648	1.02564	0.968156	1.08653
[IDU=0]	-0.231637	0.362781	-0.942675	0.4794	0.407687	1	0.523146	0.793234	0.389584	1.61511		[IDU=0]	-0.5383	0.35753	-1.23905	0.162446	2.26686	1	0.132168	0.583739	0.28966	1.17638		[IDU=0]	-0.496788	0.372545	-1.22696	0.233388	1.77821	1	0.182369	0.608482	0.293182	1.26287
[IDU=1]	0a							1				[IDU=1]	0a							1				[IDU=1]	0a							1
[PI_cART=0]	-0.465468	0.214841	-0.886549	-0.0443879	4.69404	1	0.0302675	0.627841	0.412076	0.956583		[PI_cART=0]	-0.206123	0.22665	-0.650348	0.238103	0.827066	1	0.363122	0.813733	0.521864	1.26884		[PI_cART=0]	-0.4126	0.229155	-0.861735	0.0365342	3.24192	1	0.0717765	0.661927	0.422429	1.03721
[PI_cART=1]	0a							1				[PI_cART=1]	0a							1				[PI_cART=1]	0a							1
[HCV=0]	0.277507	0.448777	-0.60208	1.15709	0.382371	1	0.536337	1.31983	0.547671	3.18068		[HCV=0]	-0.142616	0.445818	-1.0164	0.731171	0.102335	1	0.749046	0.867087	0.361894	2.07751		[HCV=0]	0.0858773	0.46854	-0.832444	1.0042	0.0335941	1	0.854573	1.08967	0.434985	2.72972
[HCV=1]	0a							1				[HCV=1]	0a							1				[HCV=1]	0a							1
[HBV=0]	-0.666473	0.519545	-1.68476	0.351815	1.64558	1	0.199561	0.513516	0.185489	1.42165		[HBV=0]	-0.517963	0.477652	-1.45414	0.418218	1.17591	1	0.27819	0.595733	0.2336	1.51925		[HBV=0]	-0.41891	0.497185	-1.39338	0.555555	0.709913	1	0.399473	0.657763	0.248236	1.74291
[HBV=1]	0a							1				[HBV=1]	0a							1				[HBV=1]	0a							1
[Caucasian=0]	-0.0486864	0.256443	-0.551305	0.453932	0.0360442	1	0.849424	0.95248	0.576198	1.57449		[Caucasian=0]	-0.113126	0.278638	-0.659247	0.432996	0.164831	1	0.684747	0.893038	0.517241	1.54187		[Caucasian=0]	0.0738856	0.271468	-0.458181	0.605952	0.0740771	1	0.785491	1.07668	0.632433	1.833
[Caucasian=1]	0a							1				[Caucasian=1]	0a							1				[Caucasian=1]	0a							1
(Scale)	1b											(Scale)	1b											(Scale)	1b
Dependent Variable: Slope_10 Model: (Intercept), rs6897932_CT_TT, Age, Male, Baseline_CD4, Years_infection, IDU, PI_cART, HCV, HBV, Caucasian												Dependent Variable: Delta24_200 Model: (Intercept), rs6897932_CT_TT, Age, Male, Baseline_CD4, Years_infection, IDU, PI_cART, HCV, HBV, Caucasian												Dependent Variable: CD4.F.350 Model: (Intercept), rs6897932_CT_TT, Age, Male, Baseline_CD4, Years_infection, IDU, PI_cART, HCV, HBV, Caucasian
a. Set to zero because this parameter is redundant.												a. Set to zero because this parameter is redundant.												a. Set to zero because this parameter is redundant.
b. Fixed at the displayed value.												b. Fixed at the displayed value.												b. Fixed at the displayed value.
≥15 CD4+ cells/mm3 per month												≥300 CD4+ cells/mm3												≥500 CD4+ cells/mm3
Parameter	B	Std. Error	95% Wald Confidence Interval		Hypothesis Test			Exp(B)	95% Wald Confidence Interval for Exp(B)			Parameter	B	Std. Error	95% Wald Confidence Interval		Hypothesis Test			Exp(B)	95% Wald Confidence Interval for Exp(B)			Parameter	B	Std. Error	95% Wald Confidence Interval		Hypothesis Test			Exp(B)	95% Wald Confidence Interval for Exp(B)
			Lower	Upper	Wald Chi-Square	df	Sig.		Lower	Upper					Lower	Upper	Wald Chi-Square	df	Sig.		Lower	Upper					Lower	Upper	Wald Chi-Square	df	Sig.		Lower	Upper
(Intercept)	-0.45483	1.21287	-2.83201	1.92235	0.140627	1	0.707659	0.634556	0.0588941	6.83704		(Intercept)	-0.182957	0.902712	-1.95224	1.58633	0.0410773	1	0.839389	0.832804	0.141956	4.88576		(Intercept)	1.05051	1.09871	-1.10292	3.20393	0.914188	1	0.339006	2.8591	0.331902	24.6292
[rs6897932_CT_TT=,00]	0.666973	0.273508	0.130907	1.20304	5.94671	1	0.0147448	1.94833	1.13986	3.33022		[rs6897932_CT_TT=,00]	0.488067	0.218309	0.0601884	0.915945	4.99821	1	0.0253736	1.62916	1.06204	2.49914		[rs6897932_CT_TT=,00]	0.89506	0.250156	0.404763	1.38536	12.8021	1	0.000346228	2.44748	1.49895	3.99625
[rs6897932_CT_TT=1,00]	0a							1				[rs6897932_CT_TT=1,00]	0a							1				[rs6897932_CT_TT=1,00]	0a							1
Age	0.041332	0.0143094	0.013286	0.069378	8.34312	1	0.00387151	1.0422	1.01337	1.07184		Age	0.0343751	0.0107727	0.013261	0.0554893	10.1821	1	0.00141811	1.03497	1.01335	1.05706		Age	0.0349364	0.012752	0.00994295	0.0599299	7.50586	1	0.00614987	1.03555	1.00999	1.06176
[Male=1]	0.9033	0.303099	0.309237	1.49736	8.88168	1	0.00288046	2.46773	1.36239	4.46988		[Male=1]	0.351361	0.257183	-0.152707	0.85543	1.86649	1	0.171878	1.421	0.858381	2.35239		[Male=1]	0.620212	0.292888	0.0461622	1.19426	4.48412	1	0.0342111	1.85932	1.04724	3.30112
[Male=2]	0a							1				[Male=2]	0a							1				[Male=2]	0a							1
Baseline_CD4	0.000255375	0.00214756	-0.00395377	0.00446452	0.0141405	1	0.905344	1.00026	0.996054	1.00447		Baseline_CD4	-0.000731755	0.00170452	-0.00407256	0.00260905	0.1843	1	0.667703	0.999269	0.995936	1.00261		Baseline_CD4	-0.00975553	0.00209154	-0.0138549	-0.00565619	21.7555	1	3.09698e-06	0.990292	0.986241	0.99436
Years_infection	0.00696477	0.0387806	-0.0690437	0.0829733	0.0322541	1	0.857471	1.00699	0.933286	1.08651		Years_infection	0.00821767	0.0293815	-0.049369	0.0658044	0.0782257	1	0.779716	1.00825	0.95183	1.06802		Years_infection	-0.00292738	0.0343693	-0.0702899	0.0644351	0.00725465	1	0.932123	0.997077	0.932124	1.06656
[IDU=0]	-0.113342	0.465433	-1.02557	0.79889	0.0593015	1	0.807603	0.892845	0.358591	2.22307		[IDU=0]	-0.647767	0.375992	-1.3847	0.0891635	2.96811	1	0.0849208	0.523213	0.2504	1.09326		[IDU=0]	-0.601405	0.446326	-1.47619	0.273377	1.81564	1	0.177833	0.548041	0.228507	1.3144
[IDU=1]	0a							1				[IDU=1]	0a							1				[IDU=1]	0a							1
[PI_cART=0]	-0.382013	0.27005	-0.911302	0.147276	2.00109	1	0.157186	0.682486	0.402	1.15867		[PI_cART=0]	-0.594246	0.215791	-1.01719	-0.171304	7.58346	1	0.00589064	0.551978	0.36161	0.842565		[PI_cART=0]	-0.668757	0.251444	-1.16158	-0.175936	7.07381	1	0.00782187	0.512345	0.312991	0.838672
[PI_cART=1]	0a							1				[PI_cART=1]	0a							1				[PI_cART=1]	0a							1
[HCV=0]	-0.199452	0.579614	-1.33547	0.93657	0.118413	1	0.730762	0.819179	0.263033	2.55121		[HCV=0]	-0.132835	0.465062	-1.04434	0.77867	0.0815835	1	0.775163	0.87561	0.351924	2.17857		[HCV=0]	-0.132212	0.561914	-1.23354	0.969119	0.0553607	1	0.813985	0.876155	0.291259	2.63562
[HCV=1]	0a							1				[HCV=1]	0a							1				[HCV=1]	0a							1
[HBV=0]	-0.459545	0.778626	-1.98562	1.06653	0.348336	1	0.555057	0.631571	0.137295	2.90529		[HBV=0]	-0.492145	0.518279	-1.50795	0.523663	0.901694	1	0.342328	0.611314	0.221363	1.6882		[HBV=0]	-0.578496	0.669257	-1.89021	0.733223	0.747162	1	0.387376	0.560741	0.151039	2.08178
[HBV=1]	0a							1				[HBV=1]	0a							1				[HBV=1]	0a							1
[Caucasian=0]	0.474055	0.346075	-0.20424	1.15235	1.87636	1	0.170748	1.6065	0.815267	3.16562		[Caucasian=0]	0.0238642	0.257699	-0.481216	0.528945	0.00857567	1	0.926217	1.02415	0.618031	1.69714		[Caucasian=0]	0.58679	0.318993	-0.038425	1.21201	3.38379	1	0.0658407	1.79821	0.962304	3.36022
[Caucasian=1]	0a							1				[Caucasian=1]	0a							1				[Caucasian=1]	0a							1
(Scale)	1b											(Scale)	1b											(Scale)	1b
Dependent Variable: Slope_15 Model: (Intercept), rs6897932_CT_TT, Age, Male, Baseline_CD4, Years_infection, IDU, PI_cART, HCV, HBV, Caucasian												Dependent Variable: Delta24_300 Model: (Intercept), rs6897932_CT_TT, Age, Male, Baseline_CD4, Years_infection, IDU, PI_cART, HCV, HBV, Caucasian												Dependent Variable: CD4.F.500 Model: (Intercept), rs6897932_CT_TT, Age, Male, Baseline_CD4, Years_infection, IDU, PI_cART, HCV, HBV, Caucasian
a. Set to zero because this parameter is redundant.												a. Set to zero because this parameter is redundant.												a. Set to zero because this parameter is redundant.
b. Fixed at the displayed value.												b. Fixed at the displayed value.												b. Fixed at the displayed value.
												≥400 CD4+ cells/mm3
												Parameter	B	Std. Error	95% Wald Confidence Interval		Hypothesis Test			Exp(B)	95% Wald Confidence Interval for Exp(B)
															Lower	Upper	Wald Chi-Square	df	Sig.		Lower	Upper
												(Intercept)	0.210463	1.05219	-1.85179	2.27272	0.0400095	1	0.841462	1.23425	0.156955	9.70578
												[rs6897932_CT_TT=,00]	0.48781	0.245063	0.00749528	0.968125	3.96229	1	0.0465305	1.62875	1.00752	2.633
												[rs6897932_CT_TT=1,00]	0a							1
												Age	0.0347474	0.0125169	0.0102147	0.0592802	7.70636	1	0.00550265	1.03536	1.01027	1.06107
												[Male=1]	0.403301	0.286517	-0.158263	0.964864	1.98133	1	0.159251	1.49676	0.853625	2.62443
												[Male=2]	0a							1
												Baseline_CD4	-0.00365663	0.00195498	-0.00748832	0.00017506	3.49847	1	0.0614257	0.99635	0.99254	1.00018
												Years_infection	0.00643247	0.0327652	-0.0577862	0.0706511	0.0385415	1	0.84436	1.00645	0.943852	1.07321
												[IDU=0]	-0.443744	0.426555	-1.27978	0.392288	1.08222	1	0.298201	0.641629	0.278099	1.48036
												[IDU=1]	0a							1
												[PI_cART=0]	-0.542	0.243898	-1.02003	-0.0639692	4.93836	1	0.0262669	0.581584	0.360584	0.938034
												[PI_cART=1]	0a							1
												[HCV=0]	0.274786	0.506417	-0.717773	1.26735	0.294424	1	0.5874	1.31625	0.487837	3.55141
												[HCV=1]	0a							1
												[HBV=0]	-0.512843	0.654705	-1.79604	0.770355	0.613589	1	0.43344	0.598791	0.165955	2.16053
												[HBV=1]	0a							1
												[Caucasian=0]	0.654876	0.31922	0.0292158	1.28054	4.2086	1	0.0402196	1.9249	1.02965	3.59857
												[Caucasian=1]	0a							1
												(Scale)	1b
												Dependent Variable: Delta24_400 Model: (Intercept), rs6897932_CT_TT, Age, Male, Baseline_CD4, Years_infection, IDU, PI_cART, HCV, HBV, Caucasian
												a. Set to zero because this parameter is redundant.
												b. Fixed at the displayed value.
												≥500 CD4+ cells/mm3
												Parameter	B	Std. Error	95% Wald Confidence Interval		Hypothesis Test			Exp(B)	95% Wald Confidence Interval for Exp(B)
															Lower	Upper	Wald Chi-Square	df	Sig.		Lower	Upper
												(Intercept)	-0.423362	1.53942	-3.44057	2.59384	0.075633	1	0.783305	0.654841	0.0320465	13.3811
												[rs6897932_CT_TT=,00]	0.771967	0.326734	0.13158	1.41235	5.58225	1	0.0181434	2.16402	1.14063	4.10561
												[rs6897932_CT_TT=1,00]	0a							1
												Age	0.0552775	0.0178182	0.0203545	0.0902005	9.62429	1	0.0019202	1.05683	1.02056	1.09439
												[Male=1]	1.10658	0.349232	0.422095	1.79106	10.04	1	0.00153175	3.02399	1.52515	5.99581
												[Male=2]	0a							1
												Baseline_CD4	-0.00126633	0.00255755	-0.00627904	0.00374638	0.245157	1	0.620506	0.998734	0.993741	1.00375
												Years_infection	0.0354193	0.0538656	-0.0701553	0.140994	0.432372	1	0.510827	1.03605	0.932249	1.15142
												[IDU=0]	0.0910635	0.54879	-0.984545	1.16667	0.0275344	1	0.868208	1.09534	0.373609	3.21129
												[IDU=1]	0a							1
												[PI_cART=0]	-0.492355	0.321256	-1.12201	0.137296	2.34884	1	0.125377	0.611186	0.325626	1.14717
												[PI_cART=1]	0a							1
												[HCV=0]	-0.257009	0.708945	-1.64652	1.1325	0.131423	1	0.716961	0.773361	0.19272	3.1034
												[HCV=1]	0a							1
												[HBV=0]	-0.660941	1.05949	-2.7375	1.41562	0.389165	1	0.532739	0.516365	0.0647321	4.11902
												[HBV=1]	0a							1
												[Caucasian=0]	0.380667	0.40407	-0.411295	1.17263	0.887519	1	0.34615	1.46326	0.662791	3.23048
												[Caucasian=1]	0a							1
												(Scale)	1b
												Dependent Variable: Delta24_500 Model: (Intercept), rs6897932_CT_TT, Age, Male, Baseline_CD4, Years_infection, IDU, PI_cART, HCV, HBV, Caucasian
												a. Set to zero because this parameter is redundant.
												b. Fixed at the displayed value.
